# Supplementary material for: Joint international consensus statement on crowdsourcing challenge contests in health and medicine: results of a modified Delphi process
Source: HighWire-hosted journal article supplement (doi:10.1136/bmjopen-2021-048699), 2021-11-01
Supplement: bmjopen-2021-048699supp002_data_supplement.pdf [file bmjopen-2021-048699supp002_data_supplement.pdf]

## Supplemental Material 2. Consensus Workshop Agenda

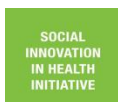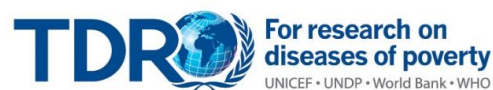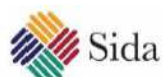

### SOCIAL INNOVATION IN HEALTH INITIATIVE PARTNERS'

### WORKSHOP

**Oct 8- 10, 2019**

Speke Resort Munyonyo, Kampala, Uganda

#### Day 1 (Tuesday, 8 October 2019): SIHI Module and Crowdsourcing

| Time         | Agenda                                                       | Speaker        |
|--------------|--------------------------------------------------------------|----------------|
| 08:00-8:15   | Self-introductions                                           | All            |
| 8:15 – 10:45 | Updates from each hub (30 min each)                          | TBD            |
| 10:45-11:00  | Tea break                                                    |                |
| 11:00-12:30  | Social innovation in health module –<br>Philippines SIHI Hub | Dr. Noel Juban |
| 12:30-13:30  | Lunch and poster viewing                                     | All            |

|               |                                                                                                    |                   |
|---------------|----------------------------------------------------------------------------------------------------|-------------------|
| 13:30 – 14:30 | Social innovation in health module – Philippines SIHI Hub                                          | Dr. Noel Juban    |
| 14:30-15:00   | Crowdsourcing sharing: SIHI Hubs share about previous contests – Challenges, barriers, experiences | Each hub to share |
| 15:00-15:15   | Tea break                                                                                          |                   |
| 15:15-15:30   | Crowdsourcing clinic (CC) introduction                                                             | Dr. Joseph Tucker |
| 15:30-16:00   | CC: Crowdsourcing Delphi Survey Results                                                            | Dr. Weiming Tang  |
| 16:00-16:30   | CC website                                                                                         | Mr. Vibhu Ambil   |
| 16:30-17:00   | CC: Selecting crowdsourcing (step 1)                                                               | Ms. Huanyu Bao    |
| 17:00-19:00   | Joint proposals and collaboration                                                                  | All               |
| 19:00         | Group dinner (supported by The Mériex Foundation)                                                  | All               |

#### Day 2 (Wednesday, 9 October 2019): Crowdsourcing Part 2 and Joint Proposal

| Time        | Agenda                                                                                  | Speaker                                                        |
|-------------|-----------------------------------------------------------------------------------------|----------------------------------------------------------------|
| 08:30-09:00 | Breakfast                                                                               |                                                                |
| 09:00-10:15 | CC: Steering committee (step 2) and promotion (step 3)                                  | Dr. Joseph Tucker & Dr. Weiming Tang                           |
| 10:15-10:30 | Tea break                                                                               |                                                                |
| 10:30-12:00 | CC: Receive contributions (step 4), recognize people (step 5), share solutions (step 6) | Mrs. Shufang Wei<br>Dr. Tiarnay Ritchwood<br>Dr. Eneyi Kpokiri |
| 12:00-13:30 | Lunch and Learn: Crowdsourcing skills workshop 1: Infographics and video                | Dr. Joseph Tucker                                              |
| 13:30-15:00 | Crowdsourcing wrap-up at each hub: Plans for next steps moving                          | Small group work                                               |
| 15:00-15:30 | Final Delphi survey                                                                     | Dr. Weiming Tang                                               |

|             |                                                                      |     |
|-------------|----------------------------------------------------------------------|-----|
| 15:30-15:45 | Tea break                                                            |     |
| 15:45-16:15 | Joint proposal discussion                                            | All |
| 16:15-16:30 | Tea break                                                            | All |
| 16:30-18:00 | Planning next steps, sharing feedback by topic (e.g., UHC, TDR call) |     |
| 19:00       | Dinner & Entertainment                                               | All |

**Day 3 (Thursday, 10 October 2019): SIHI Uganda Stakeholders' Workshop**

| Time                  | Agenda                                                                                   | Speakers                                                                                           |
|-----------------------|------------------------------------------------------------------------------------------|----------------------------------------------------------------------------------------------------|
| 08:45-09:30           | Keynote on Social Innovation in Health                                                   | Ms. Katusha de Villiers<br>SIHI South Africa                                                       |
| 09:30-10:30           | Panel Discussion on the Role of Social Innovation in improving health outcomes in Uganda | SIHI Uganda advisory committee; MoH and MoST policy makers; Social Innovator; Researcher/Evaluator |
| 10:30-11:00           | Tea break (poster viewing)                                                               |                                                                                                    |
| SIHI Network Partners |                                                                                          |                                                                                                    |
| 11:00-11:15           | SIHI Uganda                                                                              | Dr. Phyllis Awor                                                                                   |
| 11:15-11:30           | SIHI Malawi                                                                              | Dr. Don Mathanga                                                                                   |
| 11:30-11:45           | SIHI South Africa (UCT Bertha Centre)                                                    | Ms. Katusha de Villiers                                                                            |
| 11:45-12:00           | SIHI Latin America and the Caribbean                                                     | Dr. Diana Maria Castro                                                                             |
| 12:00-12:15           | SIHI Philippines                                                                         | Dr. Noel Juban                                                                                     |
| 12:15-12:30           | Social Entrepreneurship to Spur Health (SESH)                                            | Dr. Joseph D. Tucker                                                                               |
| 12:30-12:50           | The Mérieux Foundation                                                                   | Dr. Valentina Picot                                                                                |
| 12:50-13:50           | Lunch                                                                                    |                                                                                                    |

| Ugandan Innovation Talks - Innovators and partners |                                                                                                         |                                                                |
|----------------------------------------------------|---------------------------------------------------------------------------------------------------------|----------------------------------------------------------------|
| 14:00-14:15                                        | Governance, Citizenship and Accountability: Community-Centered Development in the Ugandan health Sector | Joshua Greenberg (Progressive Health Partnership)              |
| 14:15-14:30                                        | Bahemuka health Sure; improving health through community action                                         | Sam Mugisha (Platform for the Needy)                           |
| 14:30-14:45                                        | Affected or Infected; An exhibition showcasing the history of HIV in Uganda                             | Nalunga Ruth (The Uganda Academy-Infectious Disease Institute) |

|             |                                                                                                                                                                                                                   |                                                                           |
|-------------|-------------------------------------------------------------------------------------------------------------------------------------------------------------------------------------------------------------------|---------------------------------------------------------------------------|
| 14:45-15:00 | Response Innovation Lab, Uganda                                                                                                                                                                                   | Charlene Cabot (Save the Children)                                        |
| 15:00-15:15 | Building end-to end technology enabled healthcare: telemedicine, laboratory, pharmacy                                                                                                                             | Dr. Louis Kamulegeya (The Medical Concierge Group )                       |
| 15:15-15:30 | The innovative use of mobile portable ultrasound technology to improve antenatal care and prevention of mother to child transmission of HIV services in rural communities in Kigezi region of Southwestern Uganda | Dr. Geoffrey Anguyo (Kigezi Healthcare Foundation)                        |
| 15:30-15:45 | Obstetric Fistula Social Reintegration                                                                                                                                                                            | Edmund Okiboko (Uganda Village Project)                                   |
| 15:45-16:00 | From marginalized youth to social entrepreneurs                                                                                                                                                                   | Nakawuki Stella (Social Innovation Academy)                               |
| 16:00-16:15 | Promoting patients-provider engagement to increase skilled                                                                                                                                                        | Ms. Robinah Kaitiritimba (Uganda National Health Consumers' Organization) |
